# Supplementary material for: Indirect comparison of tisagenlecleucel and historical treatments for relapsed/refractory diffuse large B-cell lymphoma
Source: PubMed Central journal article supplement — Blood Adv. 2022 Apr 19;6(8):2536–47. doi: 10.1182/bloodadvances.2021006280 (PMC9043930; doi:10.1182/bloodadvances.2021006280), 2022-04-19
Supplement: advancesADV2021006280-suppl1.pdf [file advancesADV2021006280-suppl1.pdf]

## Supplementary Material

**Supplemental Table 1: Identified Confounders and their Relevance for r/r DLBCL<sup>a</sup>**

| Identified confounders                                                                              | Relevance for r/r DLBCL, rated by medical experts | Data availability in JULIET and CORAL follow-up (% of non-missing values for variables available in both studies) <sup>b</sup> |
|-----------------------------------------------------------------------------------------------------|---------------------------------------------------|--------------------------------------------------------------------------------------------------------------------------------|
| Age at initial diagnosis (>40 to ≤60 vs. >60 to <75 vs. ≥75 years)                                  | very important                                    | Available in both studies<br>(JULIET: FAS 100%; ITT 100%<br>CORAL: FAS 100%; ITT 100%)                                         |
| Performance status (ECOG 0 or 1 vs. 2 to 4)                                                         | very important                                    | Available in both studies<br>(JULIET: FAS 100%; ITT 100%<br>CORAL: FAS 16.9%; ITT 13.9%)                                       |
| Serum LDH level (normal vs. >1 to ≤3 vs. >3 ULN)                                                    | very important                                    | Available in both studies<br>(JULIET: FAS 100%; ITT 100%<br>CORAL: FAS 79.2%; ITT 67.7%)                                       |
| Ann Arbor disease stage (I, II vs. III, IV)                                                         | very important                                    | Available in both studies<br>(JULIET: FAS 100%; ITT 100%<br>CORAL: FAS 81.2%; ITT 70.3%)                                       |
| Extranodal site involvement (0 or 1 vs. ≥2 extranodal organs)                                       | very important                                    | Available in both studies<br>(JULIET: FAS 100%; ITT 100%<br>CORAL: FAS 82.1%; ITT 71.4%)                                       |
| Status of disease (refractory to all prior lines, refractory to last line, relapse after last line) | very important                                    | Available in both studies<br>(JULIET: FAS 100%; ITT 100%<br>CORAL: FAS 100%; ITT 100%)                                         |
| Time to first relapse after diagnosis (<12 vs. ≥12 vs. >24 months)                                  | very important                                    | Available in both studies<br>(JULIET: FAS 97.4%; ITT 98.2%<br>CORAL: FAS 100%; ITT 100%)                                       |
| Number of relapses                                                                                  | very important                                    | Available in both studies<br>(JULIET: FAS 100%; ITT 100%<br>CORAL: FAS 100%; ITT 100%)                                         |
| Double/triple gene hits ( <i>MYC/BCL2/BCL6</i> ), <i>MYC-IG</i> rearrangement                       | very important                                    | Not available in CORAL follow-up                                                                                               |

| <b>Identified confounders</b> | <b>Relevance for r/r DLBCL, rated by medical experts</b> | <b>Data availability in JULIET and CORAL follow-up (% of non-missing values for variables available in both studies)<sup>b</sup></b> |
|-------------------------------|----------------------------------------------------------|--------------------------------------------------------------------------------------------------------------------------------------|
|                               | very important                                           | Available in both studies<br>(JULIET: FAS 100%; ITT 100%<br>CORAL: FAS 100%; ITT 100%)                                               |
| Previous HCT (yes, no)        |                                                          |                                                                                                                                      |
| Bulky disease (yes, no)       | very important                                           | Not available in CORAL follow-up                                                                                                     |
| Molecular subtype (GCB, ABC)  | less important                                           | Not available in CORAL follow-up                                                                                                     |
| Hepatitis B infection         | not important                                            | Not available in CORAL follow-up                                                                                                     |

:

**Abbreviations:** ABC: activated B-cell; DLBCL: diffuse large B cell lymphoma; ECOG: Eastern Cooperative Oncology Group; GCB: germinal center B-cell; HCT: hematopoietic cell transplantation; LDH: lactate dehydrogenase; r/r: relapsed or refractory; ULN: upper limit of normal

Note

<sup>a</sup> Relevant confounders were defined as “very important” or “less important” by clinical experts

<sup>b</sup> If data were not available in both groups for a variable, it was not included in the analyses and missingness was not assessed.

**Supplemental Table 2. Treatment Line Distribution for the JULIET and CORAL Follow-up populations (FAS and ITT)**

| <b>FAS</b>                               |                            |                                    |                           |                                                |
|------------------------------------------|----------------------------|------------------------------------|---------------------------|------------------------------------------------|
| <b>Line distribution after selection</b> | <b>Unadjusted Analyses</b> |                                    | <b>Adjusted Analyses</b>  |                                                |
|                                          | <b>JULIET FAS (N=114)</b>  | <b>CORAL Follow-up FAS (N=170)</b> | <b>JULIET FAS (N=111)</b> | <b>CORAL Follow-up FAS (N=145)</b>             |
| 2L                                       | 5 (4.4%)                   | 0 (0.0%)                           | 5 (4.5%)                  | 0 (0.0%)                                       |
| 3L                                       | 50 (43.9%)                 | 137 (80.6%)                        | 50 (45.0%)                | 118 (81.4%)                                    |
| 4L                                       | 36 (31.6%)                 | 22 (12.9%)                         | 34 (30.6%)                | 19 (13.1%)                                     |
| 5L                                       | 14 (12.3%)                 | 7 (4.1%)                           | 14 (12.6%)                | 5 (3.4%)                                       |
| 6L                                       | 8 (7.0%)                   | 3 (1.8%)                           | 7 (6.3%)                  | 1 (0.7%)                                       |
| 7L                                       | 1 (0.9%)                   | 1 (0.6%)                           | 1 (0.9%)                  | 2 (1.4%)                                       |
| <b>ITT</b>                               |                            |                                    |                           |                                                |
|                                          | <b>JULIET ITT (N=166)</b>  | <b>CORAL Follow-up ITT (N=205)</b> | <b>JULIET ITT (N=163)</b> | <b>CORAL Follow-up ITT (N=205)<sup>a</sup></b> |
| 2L                                       | 6 (3.6%)                   | 0 (0.0%)                           | 6 (3.7%)                  | 0 (0.0%)                                       |
| 3L                                       | 72 (43.4%)                 | 157 (76.6%)                        | 72 (44.2%)                | 159 (77.6%)                                    |
| 4L                                       | 52 (31.3%)                 | 32 (15.6%)                         | 50 (30.7%)                | 33 (16.1%)                                     |
| 5L                                       | 20 (12.0%)                 | 11 (5.4%)                          | 20 (12.3%)                | 9 (4.4%)                                       |
| 6L                                       | 11 (6.6%)                  | 4 (2.0%)                           | 10 (6.1%)                 | 1 (0.5%)                                       |
| 7L-9L                                    | 5 (3.0%)                   | 1 (0.5%)                           | 5 (3.0%)                  | 3 (1.5%)                                       |

**Abbreviations:** FAS: full analysis set; L: line; ITT: intent-to-treat

**Notes:**

<sup>a</sup> For the CORAL follow-up ITT population, among those without a documented 3L+ treatment, the relapse date from last-line treatment was used as the index date. Those patients were counted based on the treatment, if they should receive one, after the relapse date from last line (i.e., a record for patient without 3L treatment but with relapse date for 2L, was considered as 3L).

**Supplemental Table 3. Patient Characteristics for the JULIET FAS and CORAL Follow-up FAS, Adjusted Analyses**

|                                                                            | JULIET<br>(N=111) | CORAL Follow-up<br>(N=145) |       | Standardized mean difference <sup>a</sup><br>(JULIET vs. CORAL Follow-up) |        |
|----------------------------------------------------------------------------|-------------------|----------------------------|-------|---------------------------------------------------------------------------|--------|
|                                                                            |                   | FSW                        | SMRW  | FSW                                                                       | SMRW   |
| <b><u>Confounders Included for Adjusted Analyses</u></b>                   |                   |                            |       |                                                                           |        |
| Age at initial diagnosis (years)                                           |                   |                            |       |                                                                           |        |
| ≤ 60                                                                       | 73.0%             | 71.1%                      | 71.4% | 0.041                                                                     | 0.035  |
| > 60                                                                       | 27.0%             | 28.9%                      | 28.6% | -0.041                                                                    | -0.035 |
| Mean                                                                       | 50.9              | 51.4                       | 51.4  | -0.043                                                                    | -0.042 |
| Ann Arbor disease stage                                                    |                   |                            |       |                                                                           |        |
| I or II                                                                    | 23.4%             | 23.9%                      | 24.1% | -0.011                                                                    | -0.015 |
| III or IV                                                                  | 76.6%             | 76.1%                      | 75.9% | 0.011                                                                     | 0.015  |
| Extranodal site involvement                                                |                   |                            |       |                                                                           |        |
| 0 - 1                                                                      | 56.8%             | 55.9%                      | 56.5% | 0.018                                                                     | 0.004  |
| ≥ 2 extranodal organs                                                      | 43.2%             | 44.1%                      | 43.5% | -0.018                                                                    | -0.004 |
| Status of disease                                                          |                   |                            |       |                                                                           |        |
| Relapsed after last line                                                   | 45.0%             | 49.5%                      | 47.4% | -0.089                                                                    | -0.048 |
| Refractory to all lines                                                    | 18.0%             | 17.6%                      | 17.6% | 0.012                                                                     | 0.010  |
| Refractory to last line but not to all lines                               | 36.9%             | 33.0%                      | 34.9% | 0.083                                                                     | 0.042  |
| Time to 2L start after diagnosis (months)                                  |                   |                            |       |                                                                           |        |
| < 12                                                                       | 55.9%             | 53.3%                      | 54.6% | 0.051                                                                     | 0.026  |
| ≥ 12 and ≤ 24                                                              | 24.3%             | 24.2%                      | 23.2% | 0.004                                                                     | 0.027  |
| > 24                                                                       | 19.8%             | 22.5%                      | 22.2% | -0.066                                                                    | -0.059 |
| Prior HCT <sup>b</sup>                                                     |                   |                            |       |                                                                           |        |
| Yes                                                                        | 50.5%             | 52.4%                      | 51.0% | -0.038                                                                    | -0.010 |
| No                                                                         | 49.5%             | 47.6%                      | 49.0% | 0.038                                                                     | 0.010  |
| Number of relapses excluding refractory <sup>c</sup>                       |                   |                            |       |                                                                           |        |
| Mean                                                                       | 1.5               | 1.5                        | 1.5   | -0.017                                                                    | -0.019 |
| <b><u>Confounders Excluded Due to Missing in the Adjusted Analyses</u></b> |                   |                            |       |                                                                           |        |
| Serum LDH level                                                            |                   |                            |       |                                                                           |        |
| Normal (LDH ≤ ULN)                                                         | 58.6%             | 71.7%                      | 72.3% | -0.279                                                                    | -0.293 |
| Elevated (LDH > ULN)                                                       | 41.4%             | 28.3%                      | 27.7% | 0.279                                                                     | 0.293  |
| ECOG                                                                       |                   |                            |       |                                                                           |        |

|                                          |        |        |        |        |        |
|------------------------------------------|--------|--------|--------|--------|--------|
| 0 - 1                                    | 100.0% | 100.0% | 100.0% | --     | --     |
| <b><u>Other Baseline Variables</u></b>   |        |        |        |        |        |
| Age (years)                              |        |        |        |        |        |
| < 40                                     | 15.3%  | 12.6%  | 12.5%  | 0.080  | 0.080  |
| ≥ 40 and < 65                            | 64.0%  | 78.5%  | 79.8%  | -0.326 | -0.357 |
| ≥ 65                                     | 20.7%  | 8.9%   | 7.7%   | 0.336  | 0.381  |
| Mean                                     | 53.5   | 54.1   | 54.1   | -0.045 | -0.044 |
| Sex                                      |        |        |        |        |        |
| Female                                   | 39.6%  | 34.5%  | 34.3%  | 0.108  | 0.110  |
| Male                                     | 60.4%  | 65.5%  | 65.7%  | -0.108 | -0.110 |
| Ann Arbor disease stage at diagnosis     |        |        |        |        |        |
| I or II                                  | 30.8%  | 35.3%  | 35.3%  | -0.095 | -0.096 |
| III or IV                                | 69.2%  | 64.7%  | 64.7%  | 0.095  | 0.096  |
| IPI <sup>d</sup>                         |        |        |        |        |        |
| < 2 risk factors                         | 27.0%  | 7.0%   | 7.0%   | 0.551  | 0.555  |
| ≥ 2 risk factors                         | 73.0%  | 93.0%  | 93.0%  | -0.551 | -0.555 |
| Number of prior lines of therapies, mean | 2.7    | 2.4    | 2.4    | 0.367  | 0.353  |

-- not calculated

**Abbreviations:** 2L; second line; alloHCT: allogeneic hematopoietic cell transplantation; autoHCT: autologous hematopoietic cell transplantation; CR: complete response; ECOG: Eastern Cooperative Oncology Group; FAS: full analysis set; FSW: fine stratification weight; HCT: hematopoietic cell transplantation; IPI: International Prognostic Index; LDH: lactate dehydrogenase; PR: partial response; SMRW: standardized mortality ratio weight; SD: standard deviation; ULN: upper limit of normal

**Notes:**

<sup>a</sup> Used a threshold of 0.1 in standardized mean difference to indicate meaningful imbalance per Austin (2009)<sup>30</sup> and Austin (2014).<sup>31</sup>

<sup>b</sup> Prior HCT only included prior autoHCT because records with an alloHCT prior to index date were excluded.

<sup>c</sup> The number of relapses was defined as the total number of lines prior to the index treatment where patient had a CR or PR as the response and relapsed later.

<sup>d</sup> The IPI includes the following risk factors: age > 60 years, elevated lactate dehydrogenase level, stage III or IV disease, ECOG performance status ≥ 2, and two or more extranodal sites.

**Supplemental Table 4. Comparison of OS for the JULIET FAS vs. CORAL Follow-up FAS, Sensitivity Analyses I-III**

| Method                               | N      |                 | Median OS (Months), Estimate (95% CI) |                   | HR (JULIET vs. CORAL Follow-up) |         |
|--------------------------------------|--------|-----------------|---------------------------------------|-------------------|---------------------------------|---------|
|                                      | JULIET | CORAL Follow-up | JULIET                                | CORAL Follow-up   | Estimate (95% CI)               | P-value |
| <b>Sensitivity I</b>                 |        |                 |                                       |                   |                                 |         |
| <i>Unadjusted analyses</i>           | 114    | 170             | 11.07 (6.64, 23.85)                   | 6.21 (5.16, 7.59) | 0.61 (0.45, 0.81)               | <.001*  |
| <i>Adjusted analyses<sup>a</sup></i> |        |                 |                                       |                   |                                 |         |
| FSW                                  | 111    | 136             | 12.48 (6.64, 28.68)                   | 4.04 (2.76, 5.88) | 0.41 (0.29, 0.57)               | <.001*  |
| SMRW                                 | 111    | 136             | 12.48 (6.64, 28.68)                   | 4.04 (3.38, 5.75) | 0.43 (0.31, 0.59)               | <.001*  |
| <b>Sensitivity II</b>                |        |                 |                                       |                   |                                 |         |
| <i>Unadjusted analyses</i>           | 114    | 170             | 11.07 (6.64, 23.85)                   | 5.36 (4.34, 6.37) | 0.54 (0.41, 0.73)               | <.001*  |
| <i>Adjusted analyses<sup>b</sup></i> |        |                 |                                       |                   |                                 |         |
| FSW                                  | 111    | 140             | 12.48 (6.64, 28.68)                   | 4.86 (3.58, 6.14) | 0.48 (0.34, 0.66)               | <.001*  |
| SMRW                                 | 111    | 140             | 12.48 (6.64, 28.68)                   | 4.86 (3.58, 6.14) | 0.49 (0.35, 0.66)               | <.001*  |
| <b>Sensitivity III</b>               |        |                 |                                       |                   |                                 |         |
| <i>Unadjusted analyses</i>           | 114    | 122             | 11.07 (6.64, 23.85)                   | 4.34 (3.52, 5.39) | 0.51 (0.37, 0.69)               | <.001*  |
| <i>Adjusted analyses<sup>c</sup></i> |        |                 |                                       |                   |                                 |         |
| FSW                                  | 111    | 122             | 12.48 (6.64, 28.68)                   | 4.86 (3.58, 6.37) | 0.52 (0.36, 0.73)               | <.001*  |
| SMRW                                 | 111    | 122             | 12.48 (6.64, 28.68)                   | 4.86 (3.55, 6.21) | 0.52 (0.37, 0.71)               | <.001*  |

\*p <0.05.

**Abbreviations:** 2L: second line; CI: confidence interval; FAS: full analysis set; FSW: fine stratification weight; HR: hazard ratio; HCT: hematopoietic cell transplantation; LDH: lactate dehydrogenase; OS: overall survival; PS: propensity score; SMRW: standardized mortality ratio weight

**Notes:**

<sup>a</sup> Age at initial diagnosis, Ann Arbor disease stage, extranodal site involvement, status of disease, time to 2L start after diagnosis, prior HCT, and number of relapses were adjusted in the PS model.

<sup>b</sup> Age at initial diagnosis, LDH, Ann Arbor disease stage, extranodal site involvement, status of disease, time to 2L start after diagnosis, prior HCT, and number of relapses were adjusted in the PS model.

<sup>c</sup> Age at initial diagnosis, status of disease, time to 2L start after diagnosis, prior HCT, and number of relapses were adjusted in the PS model.

**Supplemental Table 5. Patient Characteristics for the JULIET ITT and CORAL Follow-up ITT Populations, Adjusted Analyses**

|                                                                        | JULIET<br>(N=163) | CORAL Follow-up<br>(N=205) |       | Standardized mean difference <sup>a</sup><br>(JULIET vs. CORAL Follow-up) |        |
|------------------------------------------------------------------------|-------------------|----------------------------|-------|---------------------------------------------------------------------------|--------|
|                                                                        |                   | FSW                        | SMRW  | FSW                                                                       | SMRW   |
| <b><u>Confounders Included For Adjusted Analyses</u></b>               |                   |                            |       |                                                                           |        |
| <b><i>Demographics</i></b>                                             |                   |                            |       |                                                                           |        |
| Age at initial diagnosis (years)                                       |                   |                            |       |                                                                           |        |
| ≤ 60                                                                   | 65.0%             | 70.4%                      | 63.1% | -0.116                                                                    | 0.041  |
| > 60                                                                   | 35.0%             | 29.6%                      | 36.9% | 0.116                                                                     | -0.041 |
| Mean                                                                   | 53.2              | 51.5                       | 52.4  | 0.146                                                                     | 0.069  |
| Status of disease                                                      |                   |                            |       |                                                                           |        |
| Relapsed after last line                                               | 41.1%             | 47.2%                      | 42.6% | -0.124                                                                    | -0.031 |
| Refractory to all lines                                                | 17.2%             | 15.2%                      | 16.1% | 0.053                                                                     | 0.030  |
| Refractory to last line but not to all lines                           | 41.7%             | 37.5%                      | 41.3% | 0.085                                                                     | 0.008  |
| Time to 2L start after diagnosis (months)                              |                   |                            |       |                                                                           |        |
| < 12                                                                   | 57.7%             | 57.5%                      | 59.5% | 0.004                                                                     | -0.037 |
| ≥ 12 and ≤ 24                                                          | 25.2%             | 24.3%                      | 23.6% | 0.021                                                                     | 0.036  |
| > 24                                                                   | 17.2%             | 18.3%                      | 16.9% | -0.028                                                                    | 0.008  |
| Prior HCT <sup>b</sup>                                                 |                   |                            |       |                                                                           |        |
| Yes                                                                    | 45.4%             | 47.4%                      | 43.8% | -0.040                                                                    | 0.031  |
| No                                                                     | 54.6%             | 52.6%                      | 56.2% | 0.040                                                                     | -0.031 |
| Number of relapses excluding refractory <sup>c</sup>                   |                   |                            |       |                                                                           |        |
| Mean                                                                   | 1.4               | 1.5                        | 1.4   | -0.103                                                                    | -0.002 |
| <b><u>Confounders Excluded Due to Missing in Adjusted Analyses</u></b> |                   |                            |       |                                                                           |        |
| Serum LDH level                                                        |                   |                            |       |                                                                           |        |
| Normal (LDH ≤ ULN)                                                     | 63.8%             | 67.5%                      | 63.9% | -0.077                                                                    | -0.002 |
| Elevated (LDH > ULN)                                                   | 36.2%             | 32.5%                      | 36.1% | 0.077                                                                     | 0.002  |
| Ann Arbor disease stage                                                |                   |                            |       |                                                                           |        |
| I or II                                                                | 21.5%             | 34.0%                      | 36.4% | -0.283                                                                    | -0.334 |
| III or IV                                                              | 78.5%             | 66.0%                      | 63.6% | 0.283                                                                     | 0.334  |
| Extranodal site involvement                                            |                   |                            |       |                                                                           |        |
| 0 - 1                                                                  | 57.1%             | 75.9%                      | 75.2% | -0.407                                                                    | -0.390 |

|                                          |        |        |        |        |        |
|------------------------------------------|--------|--------|--------|--------|--------|
| ≥ 2 extranodal organs                    | 42.9%  | 24.1%  | 24.8%  | 0.407  | 0.390  |
| ECOG                                     |        |        |        |        |        |
| 0 - 1                                    | 100.0% | 100.0% | 100.0% | --     | --     |
| <b><u>Other Baseline Variables</u></b>   |        |        |        |        |        |
| Age (years)                              |        |        |        |        |        |
| < 40                                     | 12.9%  | 12.9%  | 12.6%  | 0.000  | 0.010  |
| ≥ 40 and < 65                            | 60.1%  | 78.8%  | 77.8%  | -0.413 | -0.390 |
| ≥ 65                                     | 27.0%  | 8.4%   | 9.6%   | 0.503  | 0.461  |
| Mean                                     | 55.7   | 53.9   | 54.7   | 0.146  | 0.079  |
| Sex                                      |        |        |        |        |        |
| Female                                   | 38.0%  | 34.9%  | 36.7%  | 0.065  | 0.027  |
| Male                                     | 62.0%  | 65.1%  | 63.3%  | -0.065 | -0.027 |
| Ann Arbor disease stage at diagnosis     |        |        |        |        |        |
| I or II                                  | 26.8%  | 38.1%  | 36.1%  | -0.245 | -0.203 |
| III or IV                                | 73.2%  | 61.9%  | 63.9%  | 0.245  | 0.203  |
| IPI <sup>d</sup>                         |        |        |        |        |        |
| < 2 risk factors                         | 20.2%  | 11.3%  | 10.3%  | 0.246  | 0.278  |
| ≥ 2 risk factors                         | 79.8%  | 88.7%  | 89.7%  | -0.246 | -0.278 |
| Number of prior lines of therapies, mean | 2.8    | 2.4    | 2.4    | 0.410  | 0.473  |

-- standardized mean difference not calculated

**Abbreviations:** 2L; second line; alloHCT: allogenic hematopoietic cell transplantation; autoHCT: autologous hematopoietic cell transplantation; CR: complete response; ECOG: Eastern Cooperative Oncology Group; FSW: fine stratification weight; HCT: hematopoietic cell transplantation; IPI: International Prognostic Index; ITT: intent-to-treat; LDH: lactate dehydrogenase; PR: partial response; SMRW: standardized mortality ratio weight; SD: standard deviation; ULN: upper limit of normal

**Notes:**

<sup>a</sup> Use a threshold of 0.1 in standardized mean difference to indicate meaningful imbalance per Austin (2009)<sup>30</sup> and Austin (2014).<sup>31</sup>

<sup>b</sup> Prior HCT only included prior autoHCT because records with an alloHCT prior to index date were excluded.

<sup>c</sup> The number of relapses was defined as the total number of lines prior to the index treatment where patient had a CR or PR as the response and relapsed later.

<sup>d</sup> The IPI includes the following risk factors: age >60 years, elevated lactate dehydrogenase level, stage III or IV disease, ECOG performance status ≥ 2, and two or more extranodal sites.



**Supplemental Table 6. Comparison of OS for the JULIET ITT vs. CORAL Follow-up ITT Populations, Sensitivity Analyses I-III**

| Method                               | N      |                 | Median OS (Months), Estimate (95% CI) |                   | HR (JULIET vs. CORAL Follow-up) |         |
|--------------------------------------|--------|-----------------|---------------------------------------|-------------------|---------------------------------|---------|
|                                      | JULIET | CORAL Follow-up | JULIET                                | CORAL Follow-up   | Estimate (95% CI)               | P-value |
| <b>Sensitivity I</b>                 |        |                 |                                       |                   |                                 |         |
| <i>Unadjusted analyses</i>           | 166    | 205             | 8.25 (5.82, 11.70)                    | 6.11 (5.16, 7.52) | 0.74 (0.57, 0.94)               | 0.016*  |
| <i>Adjusted analyses<sup>a</sup></i> |        |                 |                                       |                   |                                 |         |
| FSW                                  | 163    | 205             | 8.25 (5.82, 12.42)                    | 4.34 (3.29, 5.52) | 0.58 (0.46, 0.82)               | <.001*  |
| SMRW                                 | 163    | 205             | 8.25 (5.82, 12.42)                    | 5.13 (3.52, 6.08) | 0.61 (0.48, 0.80)               | <.001*  |
| <b>Sensitivity II</b>                |        |                 |                                       |                   |                                 |         |
| <i>Unadjusted analyses</i>           | 166    | 205             | 8.25 (5.82, 11.70)                    | 5.13 (3.88, 6.21) | 0.65 (0.51, 0.83)               | <.001*  |
| <i>Adjusted analyses<sup>b</sup></i> |        |                 |                                       |                   |                                 |         |
| FSW                                  | 163    | 151             | 8.25 (5.82, 12.42)                    | 4.34 (3.38, 5.78) | 0.53 (0.40, 0.70)               | <.001*  |
| SMRW                                 | 163    | 151             | 8.25 (5.82, 12.42)                    | 3.81 (3.29, 5.26) | 0.52 (0.39, 0.67)               | <.001*  |
| <b>Sensitivity III</b>               |        |                 |                                       |                   |                                 |         |
| <i>Unadjusted analyses</i>           | 166    | 148             | 8.25 (5.82, 11.70)                    | 3.84 (3.25, 5.16) | 0.59 (0.45, 0.77)               | <.001*  |
| <i>Adjusted analyses<sup>c</sup></i> |        |                 |                                       |                   |                                 |         |
| FSW                                  | 163    | 148             | 8.25 (5.82, 12.42)                    | 4.34 (3.48, 6.08) | 0.61 (0.46, 0.80)               | <.001*  |
| SMRW                                 | 163    | 148             | 8.25 (5.82, 12.42)                    | 3.98 (3.19, 5.88) | 0.59 (0.45, 0.77)               | <.001*  |

\*p <0.05.

**Abbreviations:** CI: confidence interval; FSW: fine stratification weight; HR: hazard ratio; ITT: intent-to-treat; OS: overall survival; PS: propensity score; SMRW: standardized mortality ratio weight

**Notes:**

<sup>a</sup> Age at initial diagnosis, status of disease, time to 2L start after diagnosis, prior HCT, and number of relapses were included to adjust in the PS model.

<sup>b</sup> Age at initial diagnosis, LDH, Ann Arbor disease stage, extranodal site involvement, status of disease, time to 2L start after diagnosis, prior HCT, and number of relapses were included to adjust in the PS model.

<sup>c</sup> Age at initial diagnosis, status of disease, time to 2L start after diagnosis, prior HCT, and number of relapses were included to adjust in the PS model.

**Supplemental Table 7. Comparison of OS and ORR for the JULIET FAS (n=68 FAS subset) vs. CORAL Follow-up FAS**

| <b>OS</b>                            |                           |                        |                                   |                        |                                                                          |                |
|--------------------------------------|---------------------------|------------------------|-----------------------------------|------------------------|--------------------------------------------------------------------------|----------------|
| <i>Method</i>                        | <i>N</i>                  |                        | <i>Median OS, months (95% CI)</i> |                        | <i>HR (JULIET vs. CORAL Follow-up)</i>                                   |                |
|                                      | <i>JULIET</i>             | <i>CORAL Follow-up</i> | <i>JULIET</i>                     | <i>CORAL Follow-up</i> | <i>Estimate (95% CI)</i>                                                 | <i>P-value</i> |
| <i>Unadjusted analyses</i>           | 68                        | 170                    | 11.66 (5.62, 28.68)               | 5.36 (4.34, 6.37)      | 0.58 (0.41, 0.82)                                                        | 0.002*         |
| <i>Adjusted analyses<sup>a</sup></i> |                           |                        |                                   |                        |                                                                          |                |
| FSW                                  | 67                        | 145                    | 11.66 (5.62, 28.68)               | 4.44 (3.38, 5.45)      | 0.44 (0.31, 0.65)                                                        | <.001*         |
| SMRW                                 | 67                        | 145                    | 11.66 (5.62, 28.68)               | 3.88 (3.38, 5.13)      | 0.45 (0.30, 0.66)                                                        | <.001*         |
| <b>ORR</b>                           |                           |                        |                                   |                        |                                                                          |                |
| <i>Method</i>                        | <i>N</i>                  |                        | <i>ORR (%)</i>                    |                        | <i>Response rate difference (JULIET Main Cohort vs. CORAL Follow-up)</i> |                |
|                                      | <i>JULIET Main Cohort</i> | <i>CORAL Follow-up</i> | <i>JULIET Main Cohort</i>         | <i>CORAL Follow-up</i> | <i>Estimate (95% CI)</i>                                                 | <i>P-value</i> |
| <i>Unadjusted analyses</i>           | 68                        | 170                    | 51%                               | 31%                    | 0.21 (0.07, 0.35)                                                        | 0.004*         |
| <i>Adjusted analyses<sup>a</sup></i> |                           |                        |                                   |                        |                                                                          |                |
| FSW                                  | 67                        | 145                    | 52%                               | 17%                    | 0.35 (0.19, 0.48)                                                        | <.001*         |
| SMRW                                 | 67                        | 145                    | 52%                               | 19%                    | 0.33 (0.19, 0.48)                                                        | <.001*         |

\*p<0.05

**Abbreviations:** 2L: second line; CI: confidence interval; FAS: full analysis set; FSW: fine stratification weight; HR: hazard ratio; HCT: hematopoietic cell transplantation; ORR: overall response rate; OS: overall survival; SMRW: standardized mortality ratio weight

**Notes:**

<sup>a</sup> Age at initial diagnosis, Ann Arbor disease stage, extranodal site involvement, status of disease, time to 2L start after diagnosis, prior HCT, and number of relapses were included in the adjusted analyses.
